# Supplementary material for: G protein-coupled receptor kinase-2 (GRK-2) controls exploration through neuropeptide signaling in Caenorhabditis elegans
Source: PLOS journal article supplement (doi:10.1371/journal.pgen.1010613), 2023-01-18

Figure S5

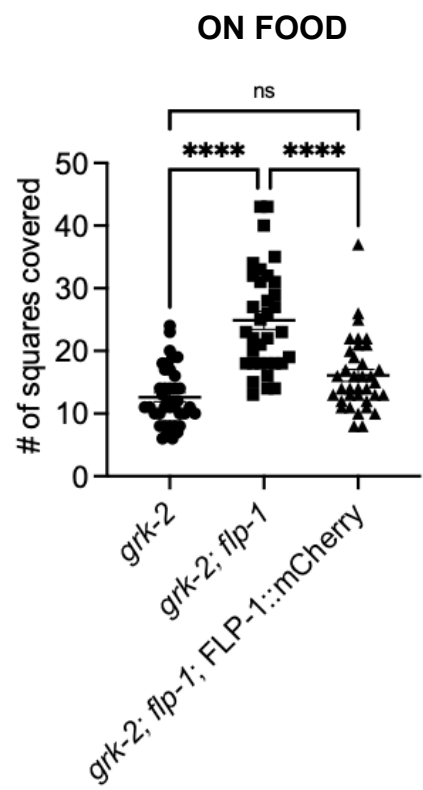

Supplement: S5 (10.1371/journal.pgen.1010613.s005) [file journal.pgen.1010613.s005]
